# Supplementary material for: Applications of advanced metrology for understanding the effects of drying temperature in the lithium-ion battery electrode manufacturing process
Source: Royal Society of Chemistry journal article supplement (doi:10.1039/d2ta00861k), 2022-01-01
Supplement: d2ta00861k1.pdf [file d2ta00861k1.pdf]

## Supporting Information (SI) for Publication

### Applications of advanced metrology for understanding the effects of drying temperature in lithium-ion battery electrodes manufacturing process

Ye Shui Zhang<sup>\*1,2,3</sup>, Josh J. Bailey<sup>1,2,4</sup>, Yige Sun<sup>2,5</sup>, Adam M. Boyce<sup>1,2</sup>, Will Dawson<sup>1,2</sup>, Carl D. Reynolds<sup>2,6</sup>, Zhenyu Zhang<sup>1,2</sup>, Xuekun Lu<sup>1,2</sup>, Patrick Grant<sup>2,5</sup>, Emma Kendrick<sup>2,6</sup>, Paul R. Shearing<sup>1,2</sup>, Dan J.L. Brett<sup>\*1,2</sup>

1. Electrochemical Innovation Lab, Department of Chemical Engineering, University College London, London, WC1E 7JE UK

2. The Faraday Institution, Quad One, Harwell Science and Innovation Campus, Didcot, OX11 0RA UK

3. School of Engineering, University of Aberdeen, Aberdeen, AB24 3UE UK

4. School of Mechanical and Aerospace Engineering, Queen's University Belfast, Belfast, BT9 5AH, UK

5. Department of Materials, University of Oxford, Parks Road, Oxford, OX1 3PH UK

6. School of Metallurgy and Materials, University of Birmingham, Birmingham, B15 2TT UK

Corresponding author: d.brett@ucl.ac.uk; yeshuizhang@ucl.ac.uk

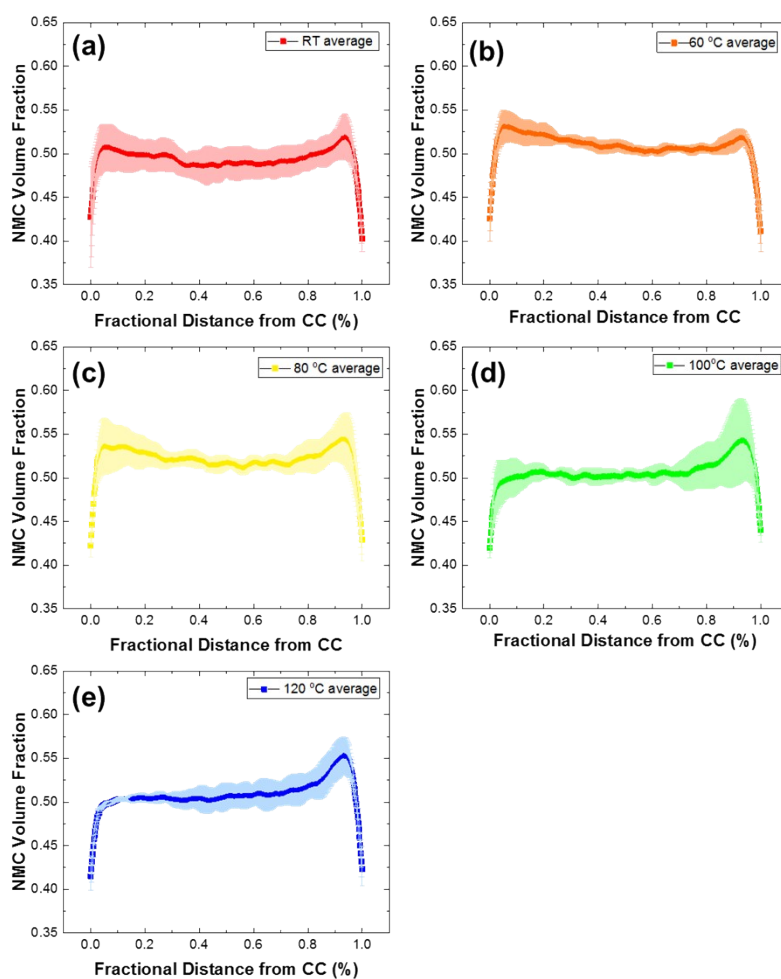

Figure S1 Areal fraction of graphite as a function of distance from the CC for anodes dried at (a) RT, (c) 60 °C, (e) 80 °C, (g) 100 °C and (i) 120 °C.

Table S1 Adhesion force test at 180° - peel-off force at 10 mm s<sup>-1</sup> for cathodes dried at RT, 60, 80, 100 and 120 °C;

| Adhesion force                     | RT (N) | 60 °C (N) | 80 °C (N) | 100 °C (N) | 120 °C (N) |
|------------------------------------|--------|-----------|-----------|------------|------------|
| Sample 1                           | 0.35   | 0.15      | 0.072     | 0.14       | 0.14       |
| Sample 2                           | 0.40   | 0.16      | 0.067     | 0.084      | 0.11       |
| Sample 3                           | 0.38   | 0.044     | 0.11      | 0.10       | 0.11       |
| Sample 4                           | 0.36   | 0.045     | 0.14      | 0.12       | 0.11       |
| Sample 5                           | 0.43   | 0.047     | 0.067     | 0.12       | 0.16       |
| Sample 6                           | N/a    | 0.012     | 0.051     | 0.13       | 0.14       |
| <b>AVERAGE (N)</b>                 | 0.39   | 0.076     | 0.085     | 0.12       | 0.13       |
| <b>STDEV (N)</b>                   | 0.030  | 0.061     | 0.035     | 0.021      | 0.021      |
| <b>AVERAGE (N mm<sup>-1</sup>)</b> | 0.015  | 0.0030    | 0.0034    | 0.0046     | 0.0051     |
| <b>STDEV (N mm<sup>-1</sup>)</b>   | 0.0012 | 0.0025    | 0.0014    | 0.00086    | 0.00084    |

Table S2 Adhesion force test at 180° - peel-off force at 10 mm s<sup>-1</sup> for anodes dried at RT, 60, 80, 100 and 120 °C;

| Adhesion force                     | RT (N)  | 60 °C (N) | 80 °C (N) | 100 °C (N) | 120 °C (N) |
|------------------------------------|---------|-----------|-----------|------------|------------|
| Sample 1                           | 0.07    | 0.052     | 0.062     | 0.071      | 0.039      |
| Sample 2                           | 0.046   | 0.096     | 0.056     | 0.059      | 0.040      |
| Sample 3                           | 0.052   | 0.044     | 0.052     | 0.050      | 0.037      |
| Sample 4                           | 0.049   | 0.044     | 0.055     | 0.046      | 0.041      |
| Sample 5                           | 0.041   | 0.046     | 0.063     | 0.054      | 0.035      |
| Sample 6                           | 0.049   | 0.047     | 0.066     | 0.054      | 0.038      |
| <b>AVERAGE (N)</b>                 | 0.047   | 0.047     | 0.059     | 0.057      | 0.038      |
| <b>STDEV (N)</b>                   | 0.0042  | 0.0032    | 0.0054    | 0.0079     | 0.0021     |
| <b>AVERAGE (N mm<sup>-1</sup>)</b> | 0.0019  | 0.0019    | 0.0024    | 0.0023     | 0.0015     |
| <b>STDEV (N mm<sup>-1</sup>)</b>   | 0.00017 | 0.00013   | 0.00022   | 0.00032    | 8.33E-05   |

Table S3 Specific capacity at different C-rates (C/10, C/5, C/3, C, 2C and 3C) of cathodes dried at different temperatures (RT, 60, 80, 100 and 120 °C).

| Unit                | State     | Rate | Cathode-RT | Cathode-60 °C | Cathode-80 °C | Cathode-100 °C | Cathode-120 °C |
|---------------------|-----------|------|------------|---------------|---------------|----------------|----------------|
| mAh g <sup>-1</sup> | Charge    | C/10 | 154.43     | 130.87        | 145.65        | 146.55         | 147.94         |
| mAh g <sup>-1</sup> | Discharge | C/10 | 150.06     | 131.76        | 142.58        | 143.36         | 144.59         |
| mAh g <sup>-1</sup> | Charge    | C/10 | 150.77     | 133.06        | 143.10        | 143.99         | 145.86         |
| mAh g <sup>-1</sup> | Discharge | C/5  | 144.98     | 127.57        | 137.78        | 137.77         | 138.68         |
| mAh g <sup>-1</sup> | Charge    | C/10 | 145.22     | 128.13        | 137.53        | 137.38         | 138.29         |
| mAh g <sup>-1</sup> | Discharge | C/3  | 140.21     | 121.71        | 131.94        | 131.31         | 130.25         |
| mAh g <sup>-1</sup> | Charge    | C/10 | 140.32     | 121.74        | 131.57        | 131.16         | 130.15         |
| mAh g <sup>-1</sup> | Discharge | C    | 122.08     | 83.16         | 98.93         | 104.49         | 108.18         |
| mAh g <sup>-1</sup> | Charge    | C/10 | 122.18     | 83.46         | 98.91         | 104.65         | 108.55         |
| mAh g <sup>-1</sup> | Discharge | 2C   | 81.83      | 15.10         | 39.44         | 54.98          | 61.68          |
| mAh g <sup>-1</sup> | Charge    | C/10 | 83.10      | 15.79         | 39.67         | 55.28          | 62.13          |
| mAh g <sup>-1</sup> | Discharge | 3C   | 17.70      | 1.34          | 7.44          | 15.24          | 14.79          |

Table S4 Specific capacity at different C-rates (C/10, C/5, C/3, C, 2C and 3C) of anodes dried at different temperatures (RT, 60, 80, 100 and 120 °C).

| Unit                | State     | Rate | Anode-RT | Anode-60 °C | Anode-80 °C | Anode-100 °C | Anode-120 °C |
|---------------------|-----------|------|----------|-------------|-------------|--------------|--------------|
| mAh g <sup>-1</sup> | Charge    | C/10 | 242.43   | 236.95      | 220.61      | 222.85       | 223.26       |
| mAh g <sup>-1</sup> | Discharge | C/10 | 203.65   | 207.32      | 203.19      | 213.30       | 199.92       |
| mAh g <sup>-1</sup> | Charge    | C/10 | 201.68   | 207.79      | 206.76      | 215.56       | 202.07       |
| mAh g <sup>-1</sup> | Discharge | C/5  | 129.02   | 134.44      | 129.69      | 148.41       | 129.85       |
| mAh g <sup>-1</sup> | Charge    | C/10 | 128.05   | 134.18      | 128.65      | 147.29       | 128.74       |
| mAh g <sup>-1</sup> | Discharge | C/3  | 70.35    | 71.81       | 67.69       | 84.93        | 64.96        |
| mAh g <sup>-1</sup> | Charge    | C/10 | 70.24    | 71.83       | 67.51       | 84.64        | 64.87        |
| mAh g <sup>-1</sup> | Discharge | C    | 28.05    | 32.51       | 25.32       | 31.68        | 21.82        |
| mAh g <sup>-1</sup> | Charge    | C/10 | 26.95    | 29.17       | 25.86       | 31.55        | 22.70        |
| mAh g <sup>-1</sup> | Discharge | 2C   | 9.02     | 13.90       | 12.45       | 14.56        | 6.81         |
| mAh g <sup>-1</sup> | Charge    | C/10 | 9.82     | 13.66       | 12.60       | 14.84        | 7.59         |
| mAh g <sup>-1</sup> | Discharge | 3C   | 3.78     | 7.45        | 6.25        | 2.11         | 1.10         |

*Table S5 Areal mass loading and areal capacity at discharge stage with C-rate at C/10 for anodes and cathodes dried at RT, 60, 80, 100, and 120 °C.*

| Cell ID        | Areal loading (g cm <sup>-2</sup> ) | Areal capacity (mAh cm <sup>-2</sup> ) |
|----------------|-------------------------------------|----------------------------------------|
| Anode-RT       | 0.0322                              | 1.6373                                 |
| Anode-60 °C    | 0.0220                              | 1.1391                                 |
| Anode-80 °C    | 0.0363                              | 1.8425                                 |
| Anode-100 °C   | 0.0256                              | 1.3682                                 |
| Anode-120 °C   | 0.0299                              | 1.4933                                 |
| Cathode-RT     | 0.0207                              | 3.1870                                 |
| Cathode-60 °C  | 0.0220                              | 2.8300                                 |
| Cathode-80 °C  | 0.0224                              | 3.2203                                 |
| Cathode-100 °C | 0.0216                              | 3.1102                                 |
| Cathode-120 °C | 0.0216                              | 3.0875                                 |
